# Supplementary material
Source: Springer Nature journal article supplement (https://www.springermedizin.de/resource/supplementary/12913_2011_1835_MOESM3_ESM.pdf/9529012)

**Number of publications**

8  
7  
6  
5  
4  
3  
2  
1  
0

1999

2000

2001

2002

2003

2004

2005

2006

2007

2008

2009

**Year**

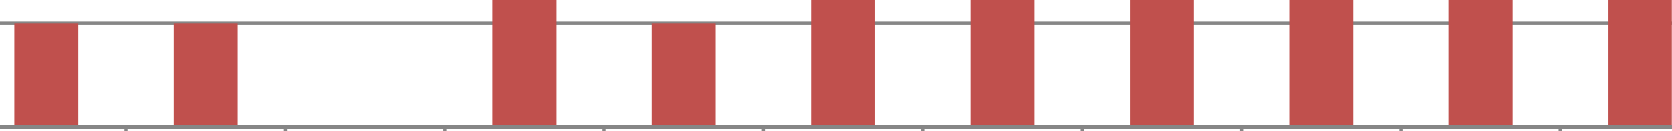

Supplement: MOESM3 [file 9529012]
